# Supplementary material for: Internet-Delivered Cognitive-Behavioral Therapy for Insomnia in Breast Cancer Survivors: A Randomized Controlled Trial
Source: PubMed Central journal article supplement — J Natl Cancer Inst. 2018 Feb 20;110(8):880–7. doi: 10.1093/jnci/djx293 (PMC6093474; doi:10.1093/jnci/djx293), 2018-02-20
Supplement: djx293_supp.pdf [file djx293_supp.pdf]

**Supplementary Table S1.**

**Proportion of participants reporting clinically significant insomnia severity, impaired sleep quality, clinically significant fatigue, and poor sleep efficiency in the intervention (iCBT-I) and the control group at baseline, post-treatment, and follow-up.**

| Outcome variable              | Baseline             |         | 9 weeks           |         |                         |                                  | 15 weeks     |         |                         |                                  |
|-------------------------------|----------------------|---------|-------------------|---------|-------------------------|----------------------------------|--------------|---------|-------------------------|----------------------------------|
|                               |                      |         | Post-intervention |         | Rate difference         | Group × time                     | Follow-up    |         | Rate difference         | Group × time                     |
|                               | Intervention         | Control | Intervention      | Control | [95%CI]                 | Wald $\chi^2$ , $p$ <sup>¶</sup> | Intervention | Control | [95%CI]                 | Wald $\chi^2$ , $p$ <sup>¶</sup> |
| N                             | 133                  | 122     | 103               | 100     |                         |                                  | 101          | 97      |                         |                                  |
| Insomnia severity (ISI >10) * | 88.7 %               | 88.2 %  | 28.2 %            | 74.0 %  | -0.46<br>[-0.58, -0.34] | 27.3; $p < 0.001$                | 21.8 %       | 60.8 %  | -0.39<br>[-0.52, -0.26] | 27.4; $p < 0.001$                |
| Sleep quality (PSQI >5) †     | 91.0 % <sup>  </sup> | 91.0 %  | 59.2 %            | 86.0 %  | -0.27<br>[-0.38, -0.15] | 8.6; $p = 0.003$                 | 52.5 %       | 80.4 %  | -0.28<br>[-0.40, -0.15] | 9.1; $p = 0.01$                  |
| Fatigue (FACIT-F <34) ‡       | 72.9 %               | 74.6 %  | 51.5 %            | 61.0 %  | -0.10<br>[-0.23, 0.04]  | 1.0; $p = 0.33$                  | 34.0 %       | 64.9 %  | -0.31<br>[-0.45, -0.18] | 16.7; $p < 0.001$                |
| N                             | 116                  | 99      | 90                | 91      |                         |                                  |              |         |                         |                                  |
| Sleep efficiency (SE < 85%) § | 79.1 %               | 72.7%   | 27.0 %            | 60.4 %  | -0.34<br>[-0.47, -0.20] | 21.8; $p < 0.001$                |              |         |                         |                                  |

\* Insomnia Severity Index (ISI) (Bastien et al., 2001)

† Pittsburgh Sleep Quality Index (PSQI) (Buysse et al., 1989)

‡ Functional Assessment of Chronic Illness Therapy (FACIT) Fatigue Scale (FACIT-F) (Yellen et al., 1997)

§ Sleep efficiency (total sleep time/total time in bed × 100) (SE)

|| The proportion of participants with PSQI >5 was 100% at screening, but < 100% at the later baseline assessment

¶ Generalized Estimating Equations, Wald  $\chi^2$  (two-sided significance level)
